# Supplementary material
Source: publisher figshare collection journal article supplement (https://acs.figshare.com/ndownloader/files/6014364)
Supplement: Supplementary file 1 [file 6014364]

# The size of Au-nanoparticles supported on Mesostructural Cellular Foams (MCF) studied by Pair Distribution Function (PDF) technique

Agnieszka Poulain<sup>a\*</sup>

*Izabela Sobczak<sup>b</sup>*

*Maria Ziolk<sup>b</sup>*

<sup>a</sup> European Synchrotron Radiation Facility (ESRF), 71 avenue des Martyrs, CS 40220,

Grenoble Cedex 9, France

<sup>b</sup> Faculty of Chemistry, Department of Heterogeneous Catalysis, Umultowska 89b, 61-614

Poznan, Poland

KEYWORDS : Pair Distribution Function, Mesostructural Cellular Foams, gold catalysts, *in situ* calcination, *in-situ* CO oxidation

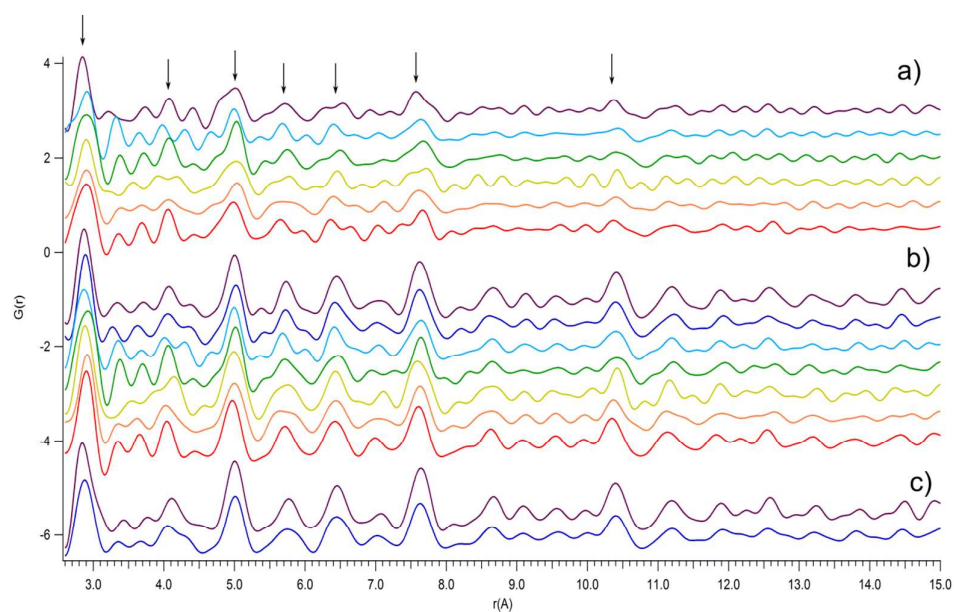

**Figure S1.** Difference PDF's showing typical Au-Au distances in cubic  $Fm\bar{3}m$  space group (down arrows). Line colors the same as in Fig. 1, a) dried, b) calcinated, c) oxidized.

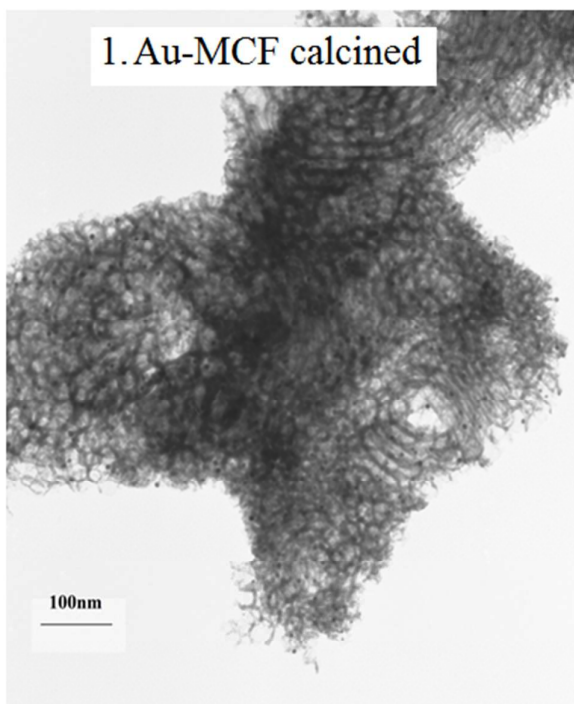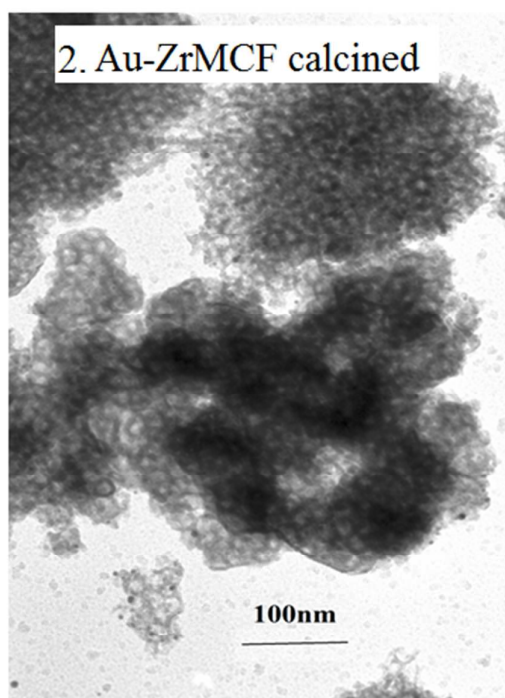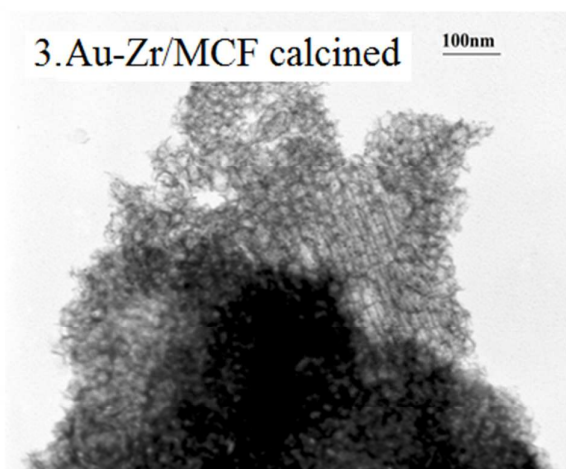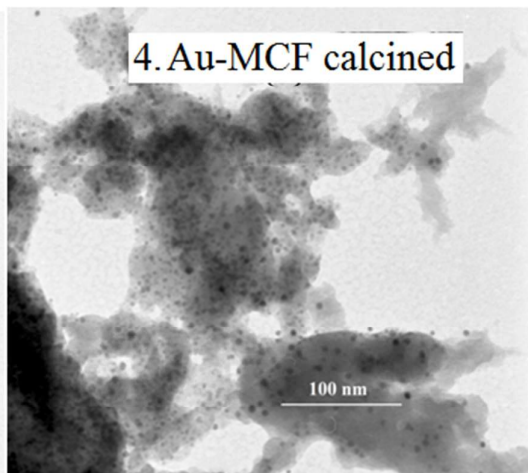

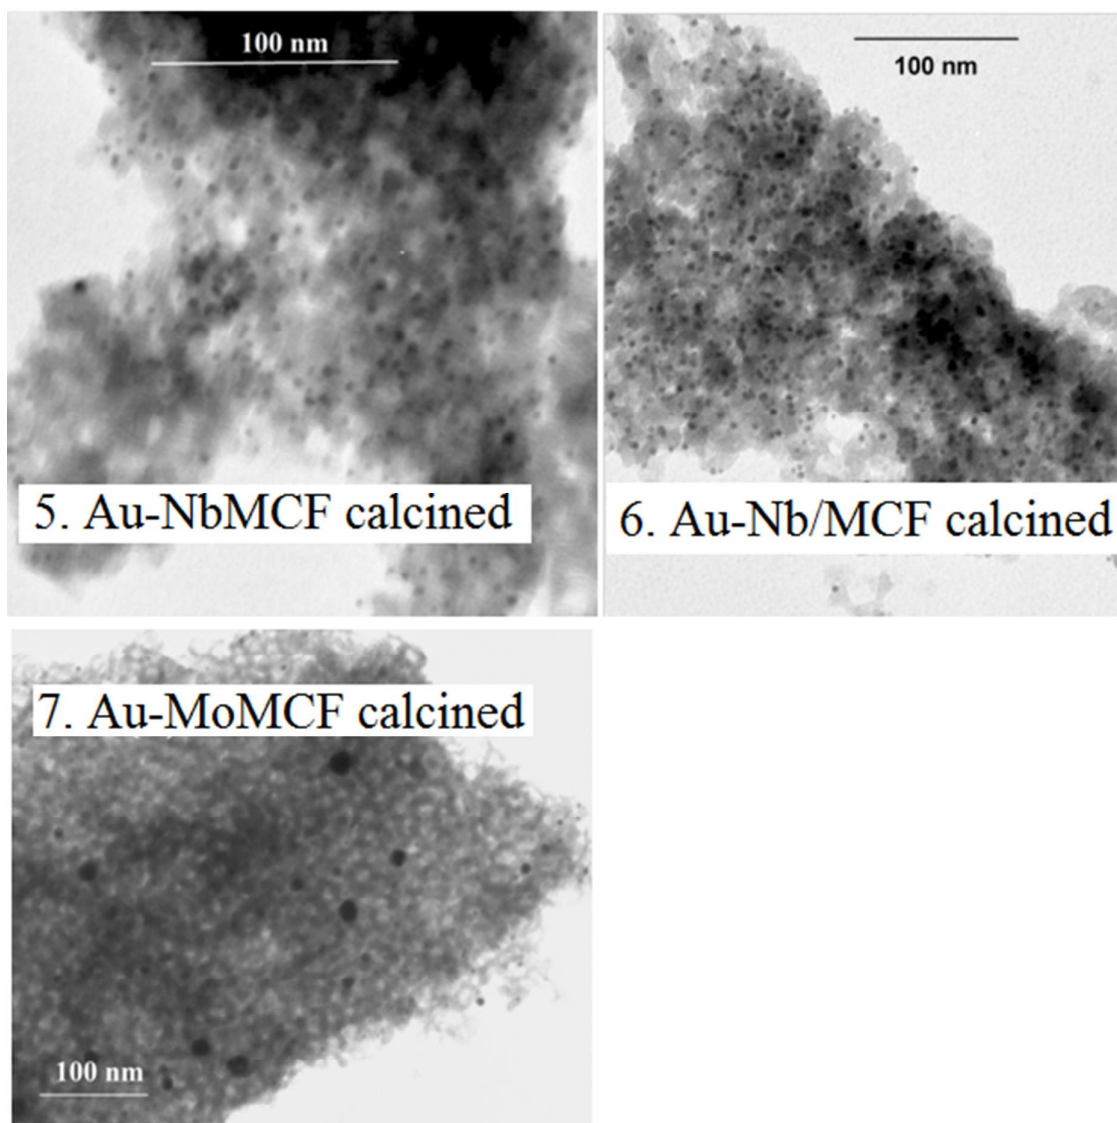

**Figure S2.** TEM images of the seven catalysts after calcination, showing the Au nanoparticle sizes.

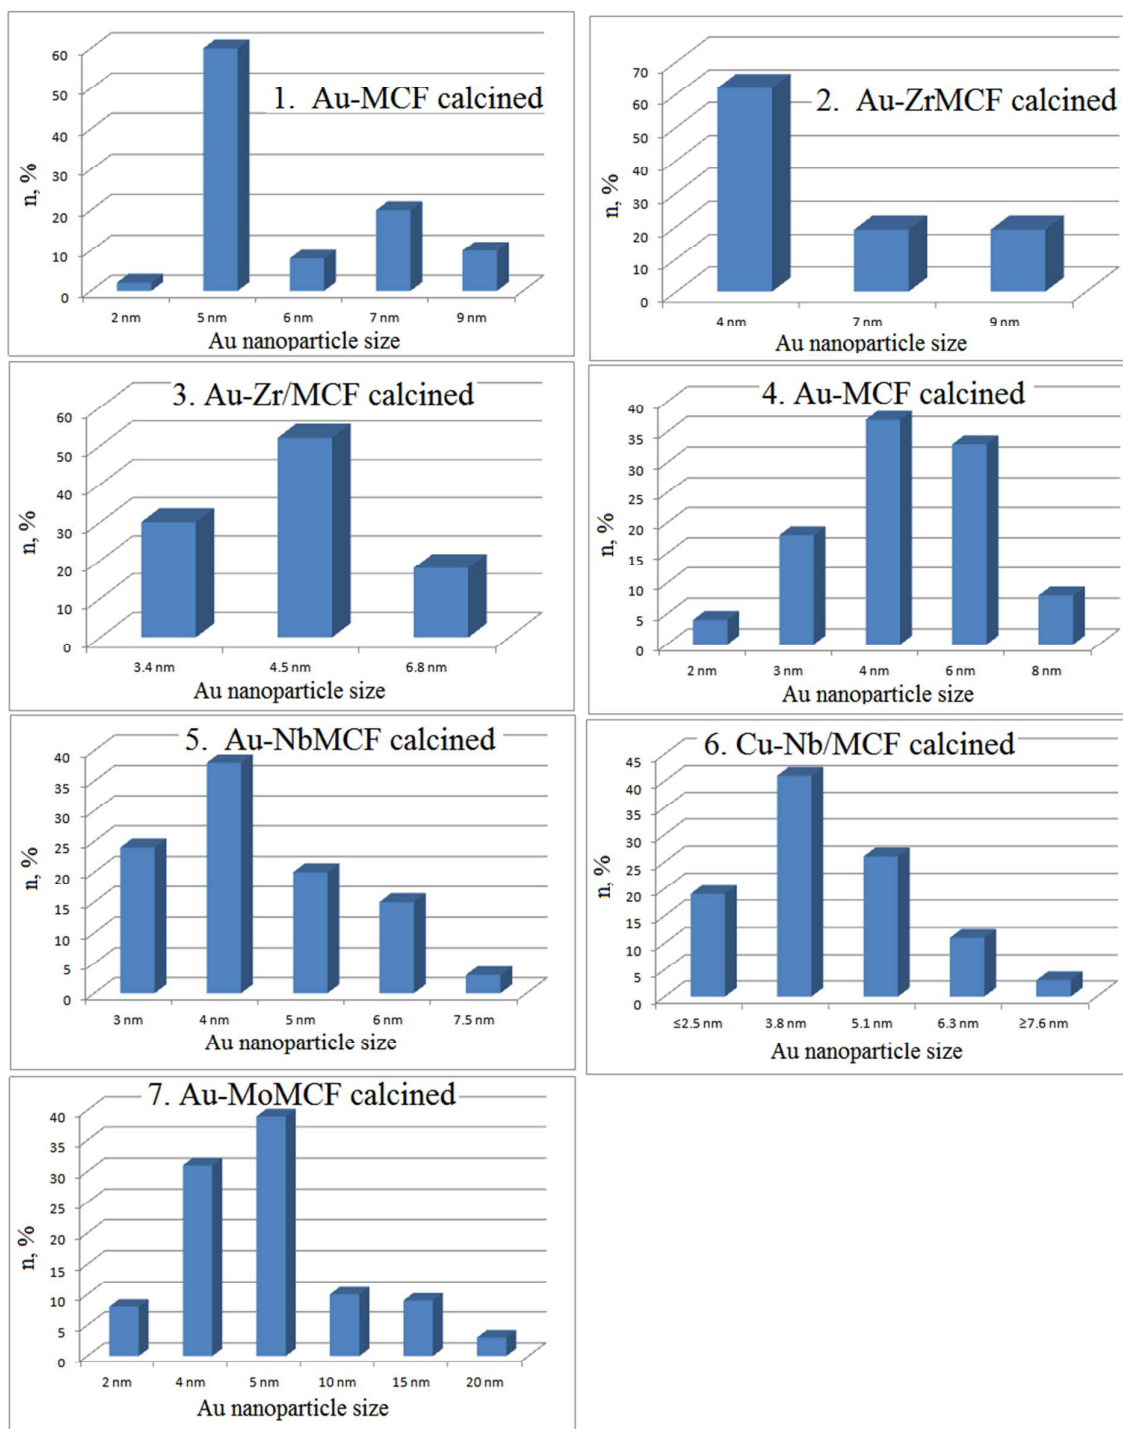

**Figure S3.** Size distribution of Au nanoparticles obtained from TEM.

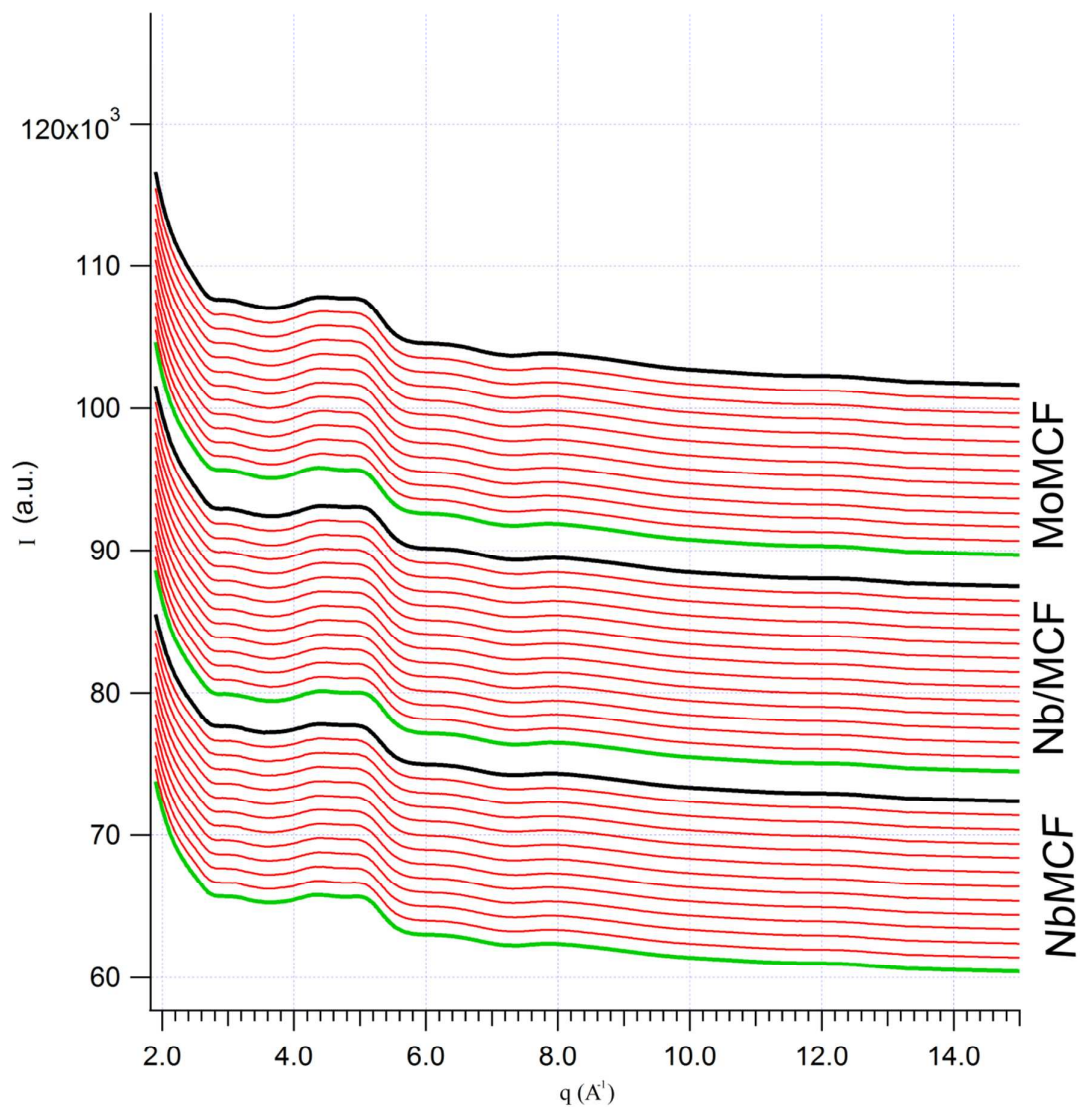

**Figure S4.** Powder diffraction patterns of catalysts 5-7 without Au-loading during calcination. Measurement done every 0.5h. Calcination progress in upward direction (from green-initial to black-final line).



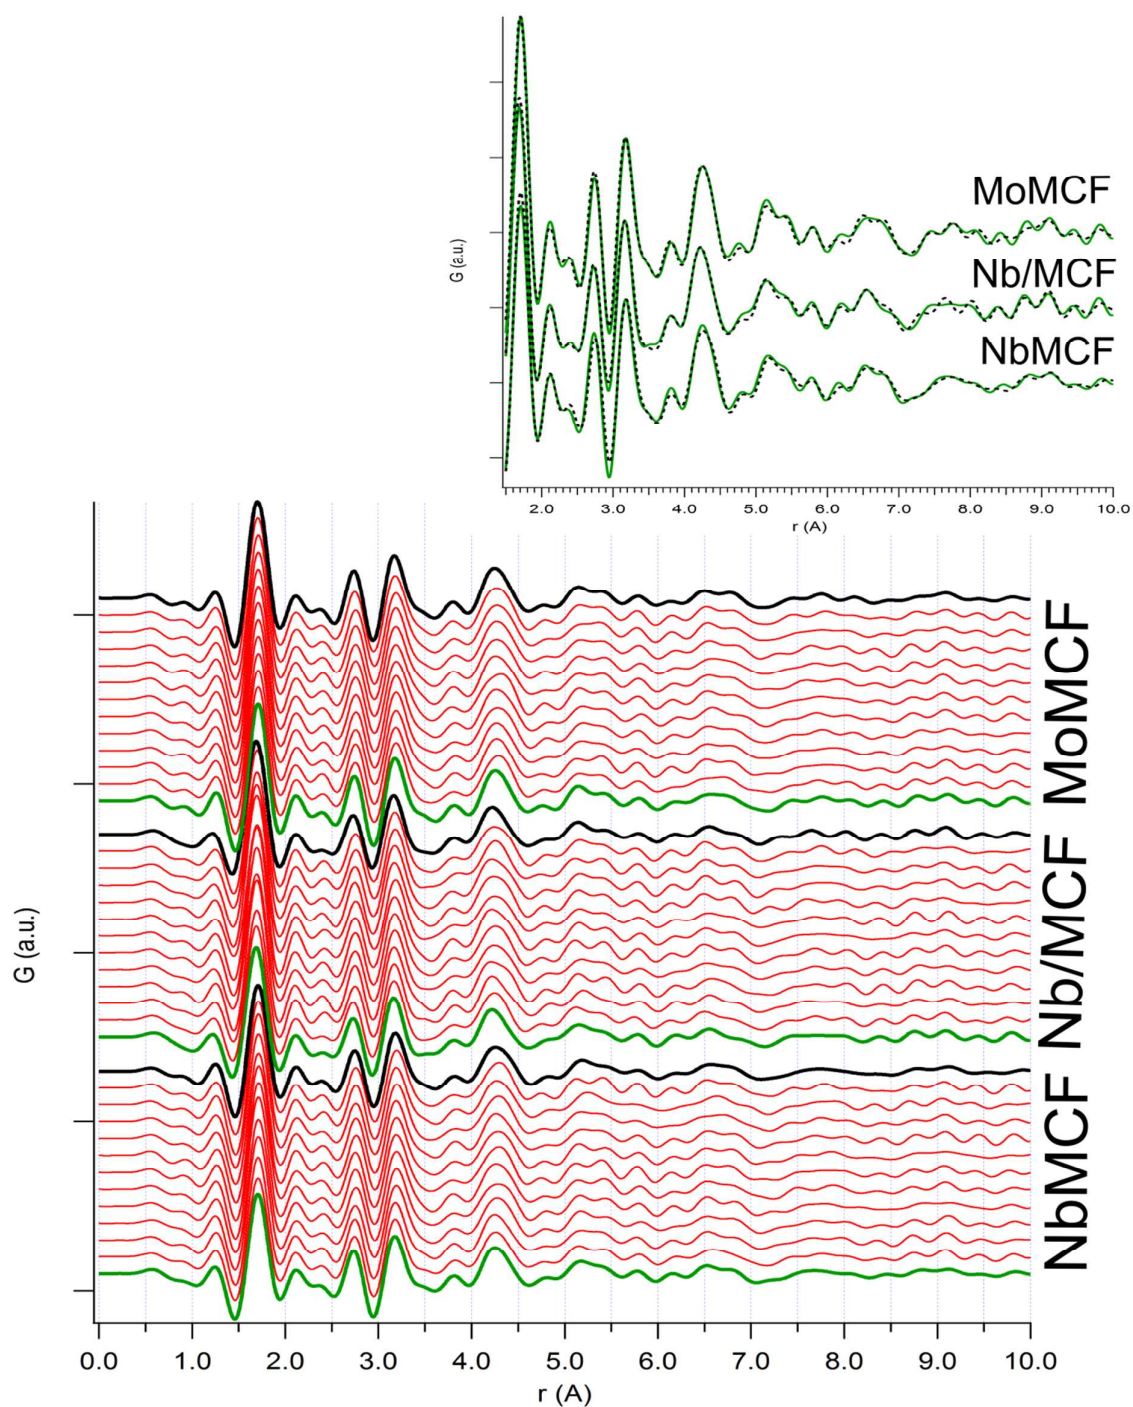

**Figure S5.** PDF plots of Au-free catalysts 5-7 during calcination. Calcination progress in upward direction (from green-initial to black-final line). Inset shows catalyst before (green solid) and after calcinations (black dashed).

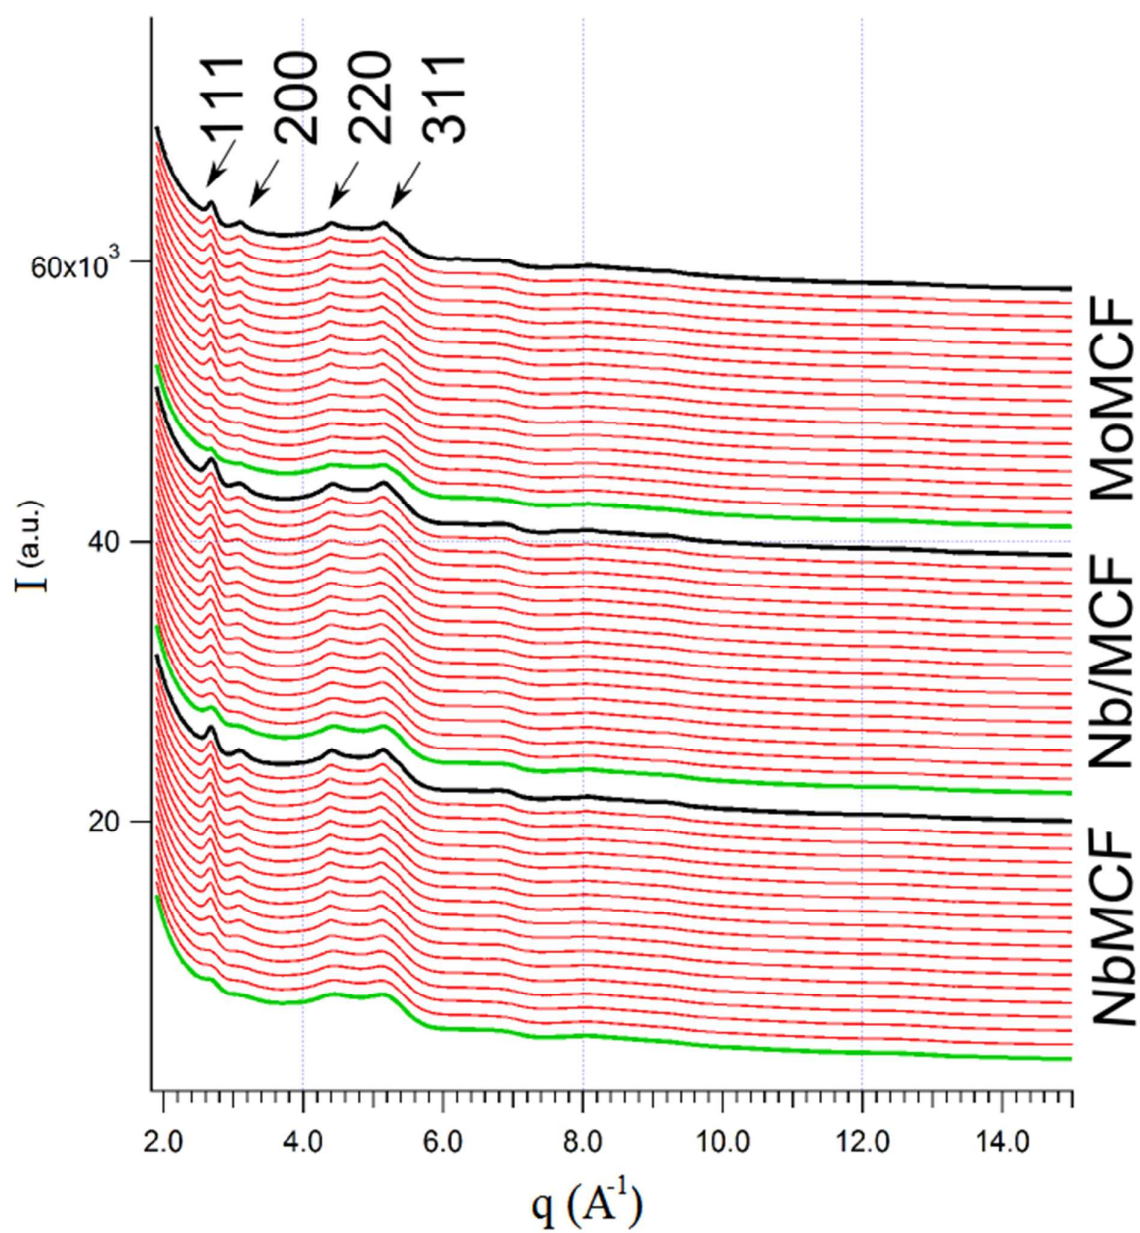

**Figure S6.** Powder diffraction patterns of catalysts 5-7 with Au-loading during calcination. Measurements taken every 0.5h.
